# Supplementary material for: Functional Consequences of the SCN5A-p.Y1977N Mutation within the PY Ubiquitylation Motif: Discrepancy between HEK293 Cells and Transgenic Mice
Source: PubMed Central journal article supplement (PMC6829230; doi:10.3390/ijms20205033), 2019-10-11
Supplement: ijms-20-05033-s001.pdf [file ijms-20-05033-s001.pdf]

# **Supplementary Materials**

## **Functional consequences of the *SCN5A*-p.Y1977N mutation within the PY ubiquitylation motif: discrepancy between HEK293 cells and transgenic mice**

Simona Casini\*, Maxime Albesa\*, Zizun Wang, Vincent Portero, Daniela Ross-Kaschitza, Jean-Sébastien Rougier, Gerard A. Marchal, Wendy K. Chung, Connie R. Bezzina, Hugues Abriel\*, Carol Ann Remme\*

\* These authors contributed equally

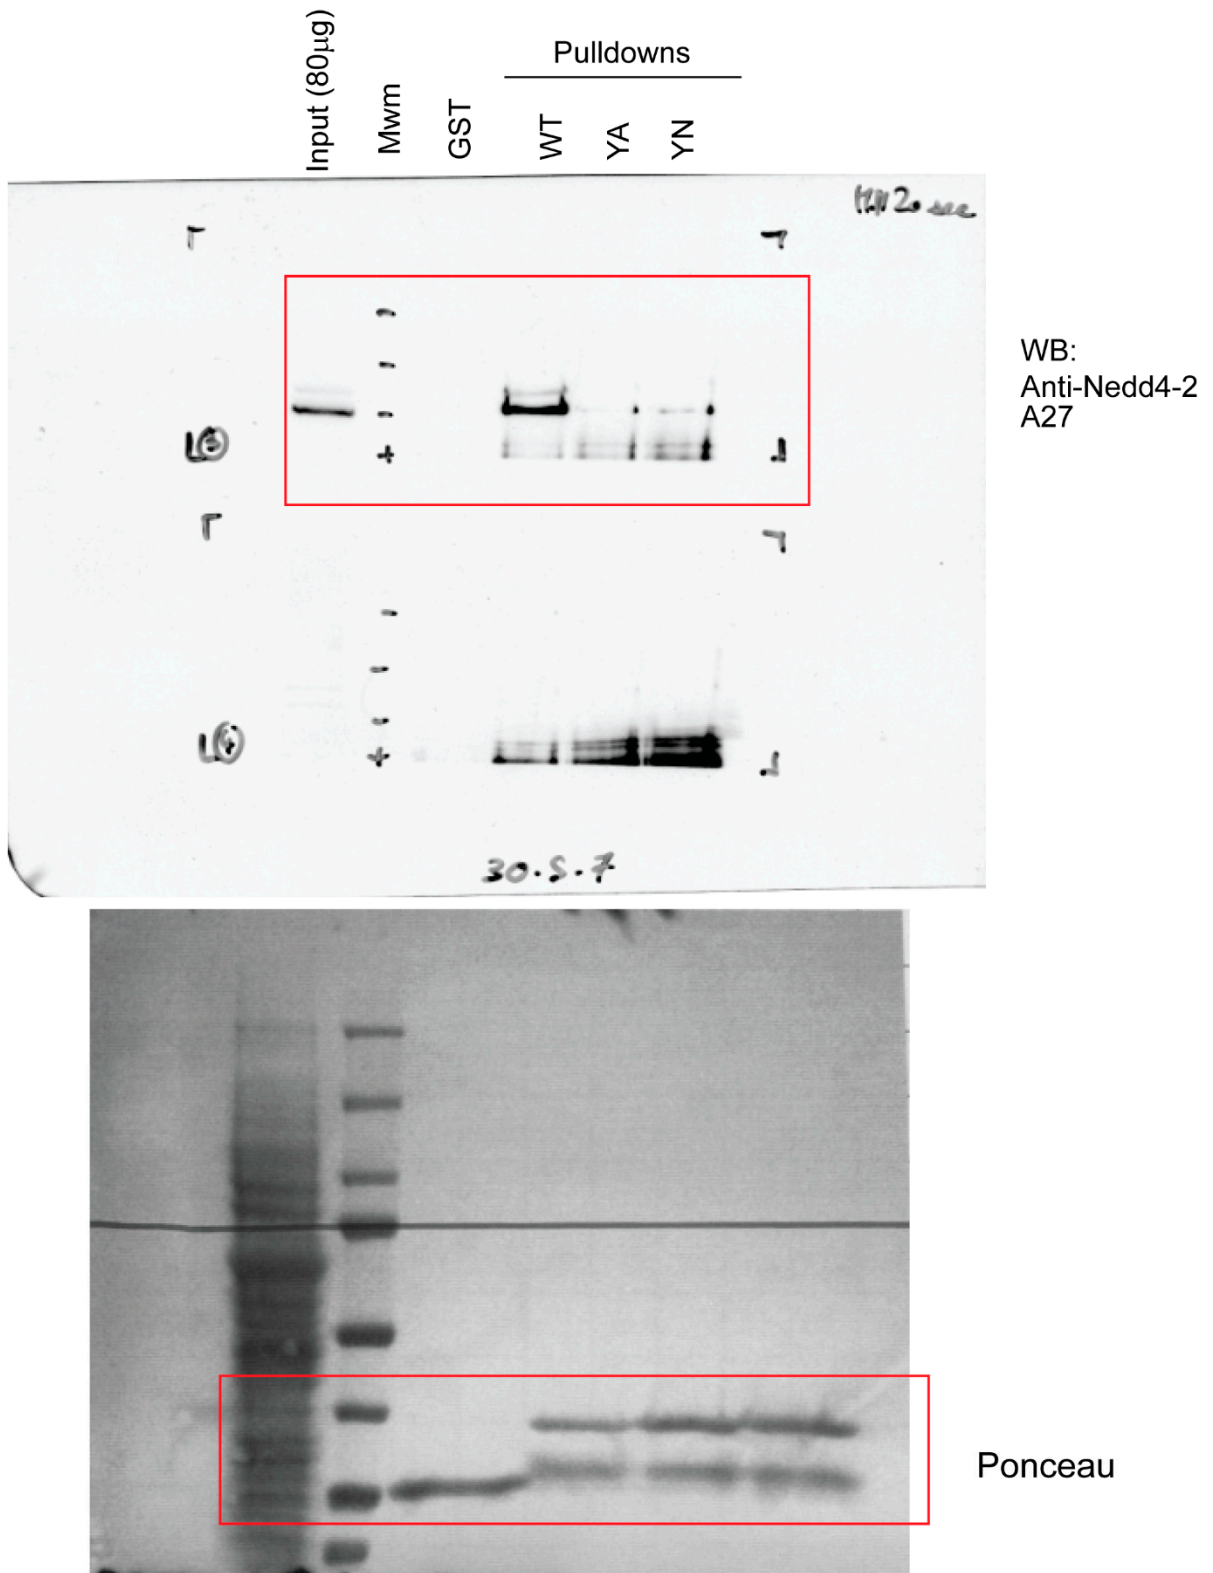

**Figure S1. Raw images of the Western blot of Figure 1B.** Uncropped version of the Western blot reported in Figure 1B of the manuscript. Red rectangles indicate the areas shown in Figure 1B.

|                        |   |   |   |   |
|------------------------|---|---|---|---|
| Na <sub>v</sub> 1.5 WT | + | + | - | - |
| Na <sub>v</sub> 1.5 YN | - | - | + | + |
| Nedd4-2 WT             | - | + | - | + |

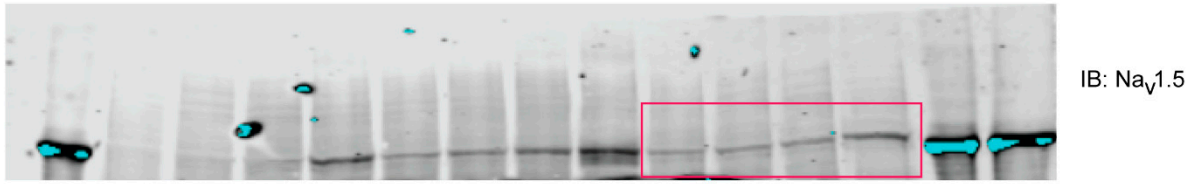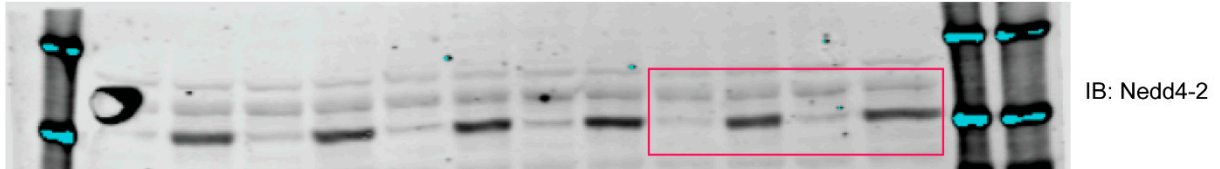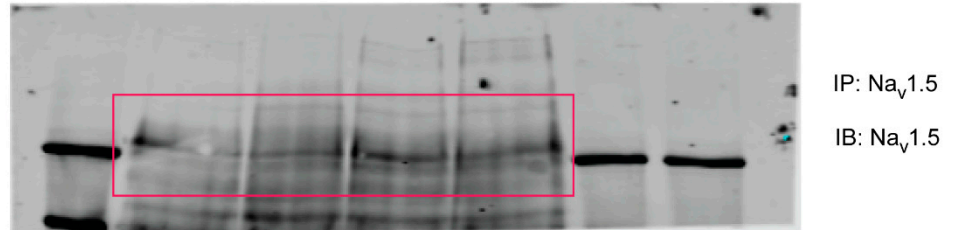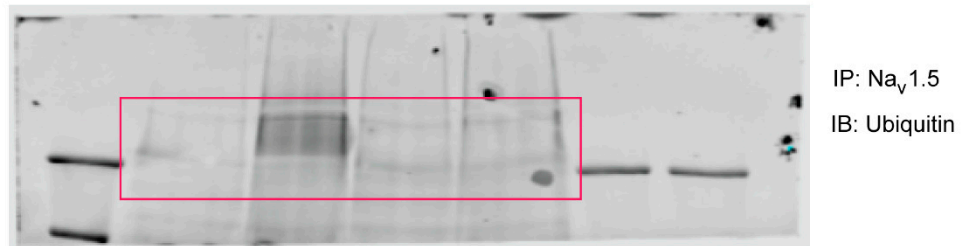

**Figure S2. Raw images of the Western blot of Figure 1C.** Uncropped version of the Western blot reported in Figure 1C of the manuscript. Red rectangles indicate the areas shown in Figure 1C.

|                        |   |   |   |   |   |   |   |   |
|------------------------|---|---|---|---|---|---|---|---|
| Na <sub>v</sub> 1.5 WT | - | + | + | + | - | - | - | - |
| Na <sub>v</sub> 1.5 YN | - | - | - | - | - | + | + | + |
| Nedd4-2 WT             | - | - | + | - | - | - | + | - |
| Nedd4-2 CS             | - | - | - | + | - | - | - | + |

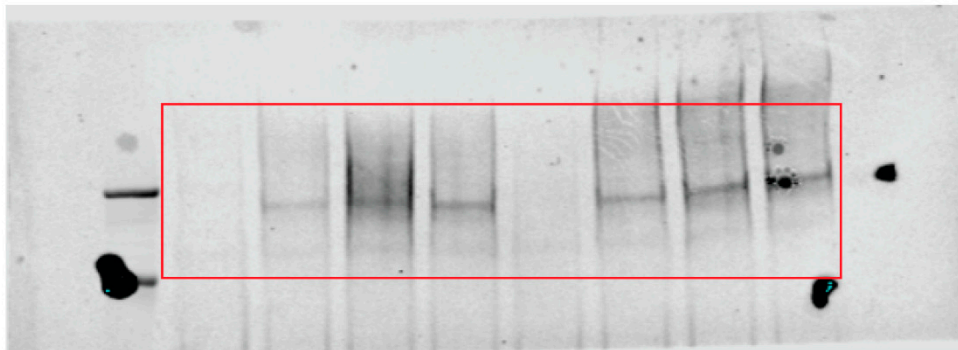

Pull-down  
GST-S5A  
IB: Na<sub>v</sub>1.5

**Figure S3. Raw image of the Western blot of Figure 1D.** Uncropped version of the Western blot presented in Figure 1D of the manuscript. Red rectangle indicates the area shown in Figure 1D.

|           |   |   |   |   |
|-----------|---|---|---|---|
| Nav1.5 WT | + | - | + | - |
| Nav1.5 YN | - | + | - | + |
| Nedd4-2   | - | - | + | + |

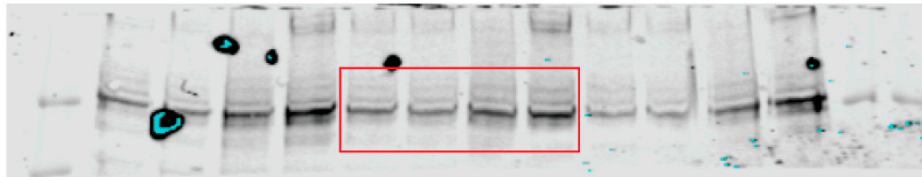

IB: Nav<sub>v</sub>1.5

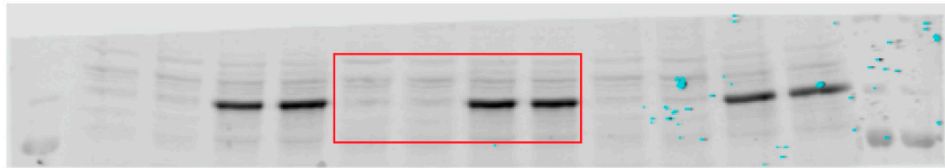

IB: Nedd4-2

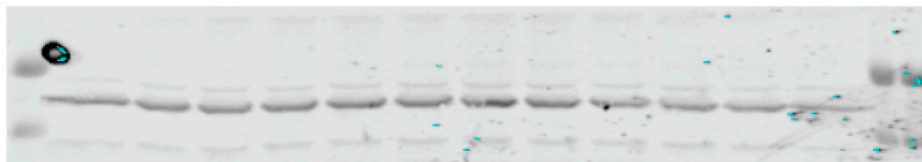

IB: Actin

**Figure S4. Raw images of the Western blot of Figure 3A.** Uncropped version of the Western blot presented in Figure 3A of the manuscript. Red rectangles indicate the areas shown in Figure 3A.

|                        |   |   |   |   |
|------------------------|---|---|---|---|
| Na <sub>v</sub> 1.5 WT | + | - | + | - |
| Na <sub>v</sub> 1.5 YN | - | + | - | + |
| Nedd4-2                | - | - | + | + |

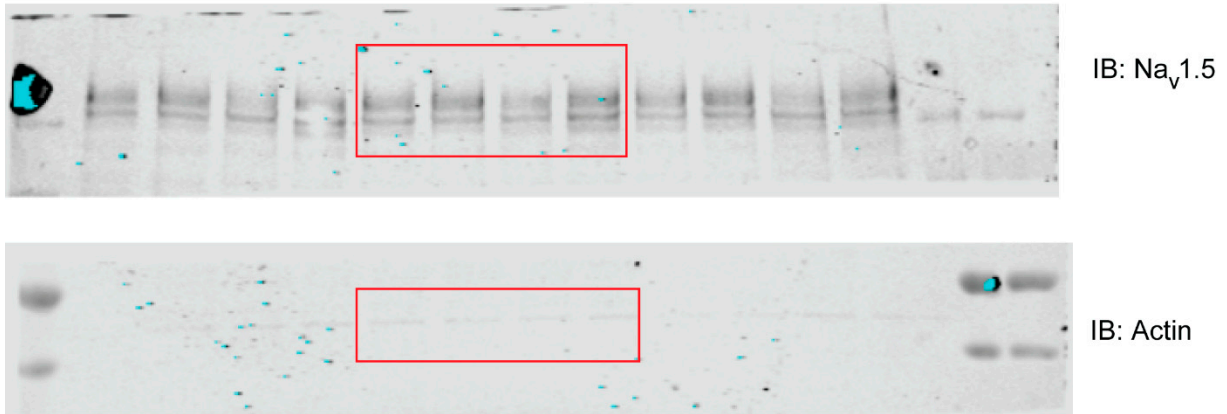

**Figure S5. Raw images of the Western blot of Figure 3C.** Uncropped version of the Western blot presented in Figure 3C of the manuscript. Red rectangles indicate the areas shown in Figure 3C.

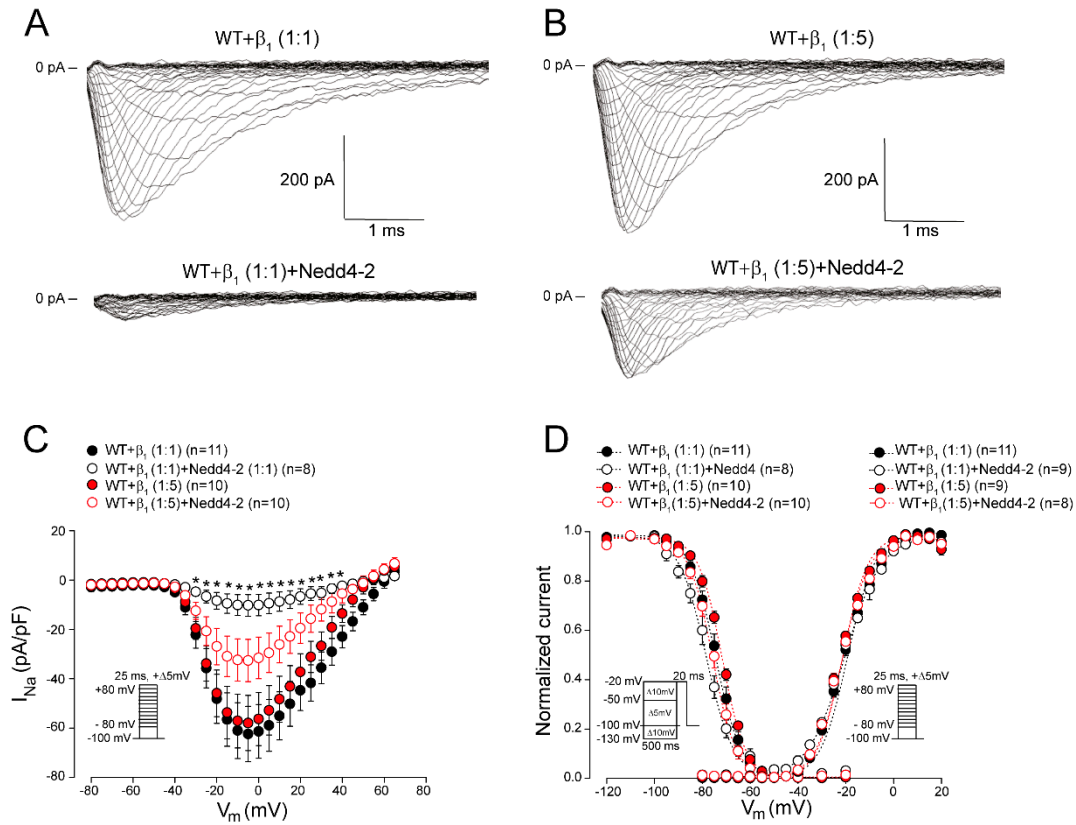

**Figure S6. Nedd4-2-dependent regulation of wild-type sodium current in the presence of increasing ratios of the accessory subunit *SCN1B*.** Typical example of sodium current recordings obtained in HEK293 cells transiently transfected with wild-type *SCN5A* (WT) and *SCN1B* ( $\beta_1$ -subunit) at a ratio of 1:1 (A) or 1:5 (B) with or without Nedd4-2. Average sodium current-voltage relationship (C) and voltage dependence of activation and inactivation (D) for HEK293 cells transiently transfected with WT and  $\beta_1$ -subunit at a ratio of 1:1 or 1:5 with or without Nedd4-2. Insets: voltage clamp protocols. \* $p < 0.05$  vs WT+ $\beta_1$  (1:1) two-way repeated measures ANOVA followed by Holm-Sidak test for post-hoc analysis. n indicates the number of cells.

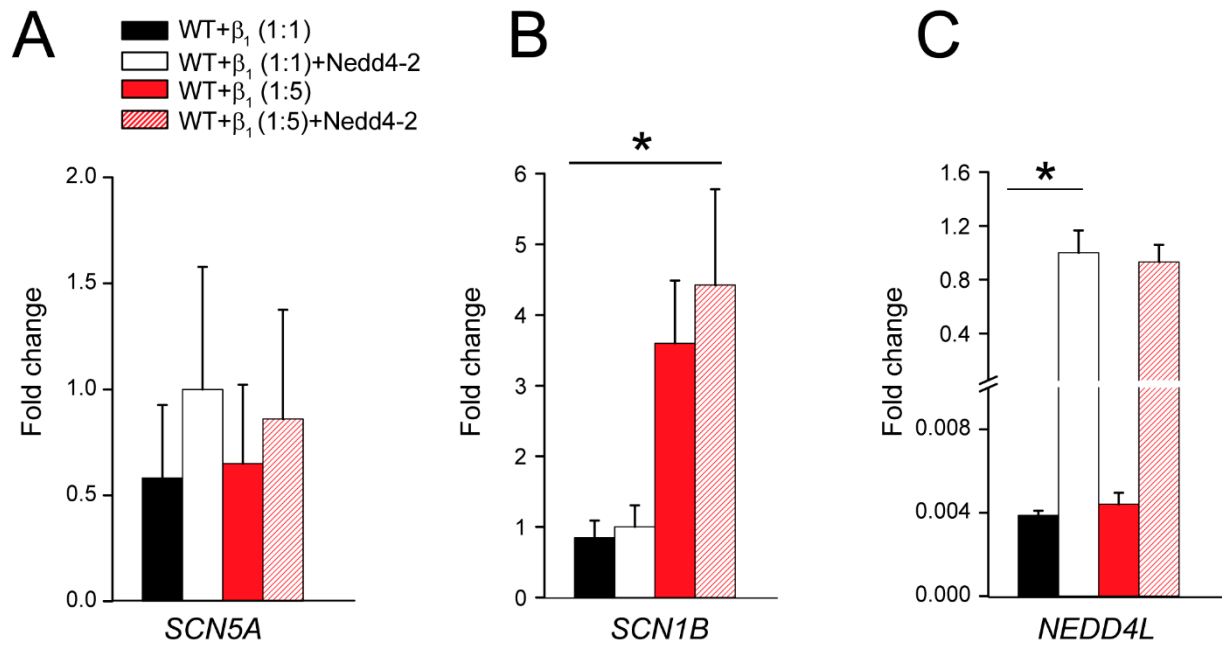

**Figure S7. *SCN5A*, *SCN1B* and *NEDD4L* (Nedd4-2) transcript levels in HEK293 cells transfected with increasing ratios of the accessory subunit *SCN1B*.** Expression levels for *SCN5A* (A), *SCN1B* (B) and *NEDD4L* (Nedd4-2) (C) in HEK293 cells transiently transfected with wild-type *SCN5A* (WT) and *SCN1B* ( $\beta_1$ -subunit) at a ratio of 1:1 or 1:5 with or without Nedd4-2. Data are expressed as fold change compared to the WT+ $\beta_1$ (1:1)+Nedd4-2 group and normalized for *GAPDH*. Depicted data are average and SEM of 4 independent biological replicates.\* $p < 0.05$  Kruskal-Wallis one way ANOVA followed by Tukey test for post-hoc analysis.



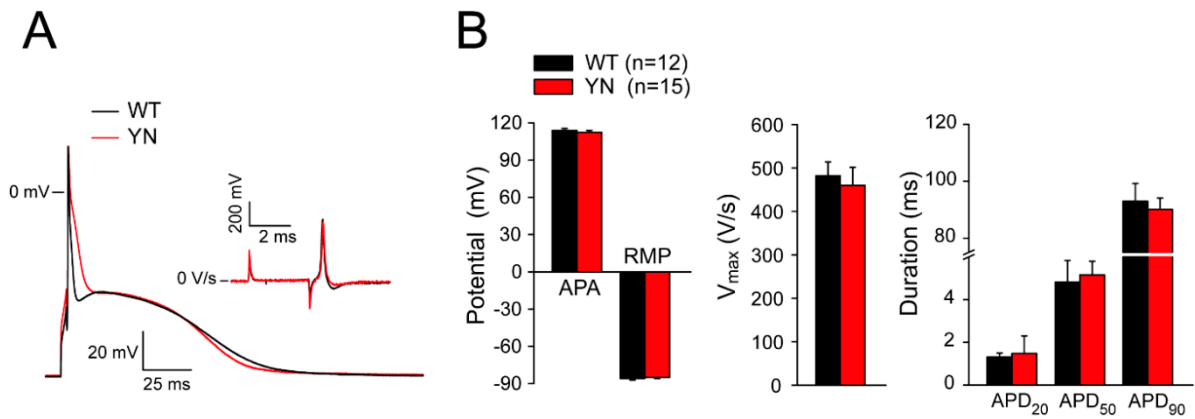

**Figure S8. Action potential properties in wild-type and *Scn5a*-p.Y1981N cardiomyocytes at 4 Hz.** (A) Typical examples of action potentials (APs) triggered at 4 Hz and first derivative (dV/dt) of the AP upstroke (inset) in wild-type (WT) and *Scn5a*-p.Y1981N (YN) mouse cardiomyocytes. (B) Average values for AP amplitude (APA), resting membrane potential (RMP), maximal upstroke velocity ( $V_{max}$ ; measured as the maximal dV/dt of the AP upstroke) and AP duration at 20%, 50% and 90% repolarization (APD<sub>20</sub>, APD<sub>50</sub>, APD<sub>90</sub>) at the stimulation frequency of 4 Hz in WT (n=12 cardiomyocytes from 5 mice) and YN cardiomyocytes (n=15 from 5 mice).

**Table S1:** Sodium current biophysical properties in HEK293 cells transiently transfected with *SCN5A* wild-type (WT) or *SCN5A*-p.Y1977N (YN), with or without Nedd4-2

|                               | WT         | n  | WT+Nedd4-2              | n | YN        | n  | YN+Nedd4-2            | n  |
|-------------------------------|------------|----|-------------------------|---|-----------|----|-----------------------|----|
| <b><u>Current density</u></b> |            |    |                         |   |           |    |                       |    |
| <b>I<sub>Na</sub> (pA/pF)</b> | -69.2±13.9 | 10 | -23.4±8.0* <sup>#</sup> | 8 | -66.5±9.4 | 11 | -67.0±9.5             | 11 |
| <b><u>Activation</u></b>      |            |    |                         |   |           |    |                       |    |
| <b>V<sub>1/2</sub> (mV)</b>   | -22.2±1.3  | 10 | -19.8±1.6               | 8 | -21.8±0.9 | 11 | -22.4±0.8             | 11 |
| <b>k (mV)</b>                 | 6.7±0.2    | 10 | 6.5±0.3                 | 8 | 6.9±0.3   | 11 | 6.7±0.2               | 11 |
| <b><u>Inactivation</u></b>    |            |    |                         |   |           |    |                       |    |
| <b>V<sub>1/2</sub> (mV)</b>   | -75.1±1.0  | 11 | -74.8±0.7               | 7 | -74.9±0.8 | 13 | -77.4±0.8             | 8  |
| <b>k (mV)</b>                 | -4.8±0.2   | 11 | -4.6±0.2                | 7 | -5.0±0.2  | 13 | -5.6±0.2 <sup>§</sup> | 8  |

I<sub>Na</sub>, sodium current density measured at -5 mV; V<sub>1/2</sub> of (in)activation, half-voltage of (in)activation; k, slope of the (in)activation curves; \*p<0.05 vs WT, <sup>#</sup>p<0.05 vs YN+Nedd4-2 (two-way repeated measures ANOVA followed by Holm-Sidak test for post-hoc analysis, as indicated in Figure 2); <sup>§</sup>p<0.05 vs WT+Nedd4-2, one way ANOVA followed by Holm-Sidak test for post-hoc analysis.

**Table S2.** Sodium current biophysical properties in HEK293 cells transiently transfected with *SCN5A* wild-type (WT) and *SCN1B* ( $\beta_1$ -subunit) at a ratio of 1:1 or 1:5 with or without Nedd4-2

|                               | WT+ $\beta_1$<br>(1:1) | n  | WT+ $\beta_1$ (1:1)<br>+Nedd4-2 | n | WT+ $\beta_1$<br>(1:5) | n  | WT+ $\beta_1$ (1:5)<br>+Nedd4-2 | n  |
|-------------------------------|------------------------|----|---------------------------------|---|------------------------|----|---------------------------------|----|
| <b><u>Current density</u></b> |                        |    |                                 |   |                        |    |                                 |    |
| <b>I<sub>Na</sub> (pA/pF)</b> | -62.4±11.2             | 11 | -10.2±4.4*                      | 8 | -58.0±11.2             | 10 | -32.6 ±8.6                      | 10 |
| <b><u>Activation</u></b>      |                        |    |                                 |   |                        |    |                                 |    |
| <b>V<sub>1/2</sub> (mV)</b>   | -20.0±0.7              | 11 | -20.1±0.8                       | 8 | -21.7±0.6              | 10 | -20.9±1.0                       | 10 |
| <b>k (mV)</b>                 | 7.0±0.2                | 11 | 9.0±0.6 <sup>S</sup>            | 8 | 6.5±0.1                | 10 | 7.1±0.3                         | 10 |
| <b><u>Inactivation</u></b>    |                        |    |                                 |   |                        |    |                                 |    |
| <b>V<sub>1/2</sub> (mV)</b>   | -74.3±1.1              | 11 | -78.4±1.1 <sup>#, &amp;</sup>   | 9 | -72.1±0.5              | 10 | -75.6±1.1                       | 8  |
| <b>k (mV)</b>                 | -5.4±0.2               | 11 | -7.0±0.7                        | 9 | -5.4±0.3               | 10 | -5.3±0.3                        | 8  |

I<sub>Na</sub>, sodium current density measured at -5 mV; V<sub>1/2</sub> of (in)activation, half-voltage of (in)activation; *k*, slope of the (in)activation curves; \*p<0.05 vs WT+ $\beta_1$  (1:1), two-way repeated measures ANOVA followed by Holm-Sidak test for post-hoc analysis, as indicated in Figure S6; .<sup>S</sup>p<0.05 vs WT+ $\beta_1$  (1:5), #p<0.05 vs WT+ $\beta_1$  (1:1), &p<0.05 vs WT+ $\beta_1$  (1:5); one way ANOVA followed by Holm-Sidak test for post-hoc analysis or Kruskal-Wallis one way ANOVA followed by Dunn's test for post-hoc analysis when data were not normally distributed.

**Table S3:** Action potential characteristics at the stimulation frequency of 2 Hz and 4Hz for left ventricular cardiomyocytes isolated from wild-type (WT) and *Scn5a*-p.Y1981N (YN) mice.

|                              | <b>WT (2Hz)</b><br><b>(n=10)</b> | <b>YN (2Hz)</b><br><b>(n=14)</b> | <b>WT (4Hz)</b><br><b>(n=12)</b> | <b>YN (4Hz)</b><br><b>(n=15)</b> |
|------------------------------|----------------------------------|----------------------------------|----------------------------------|----------------------------------|
| <b>RMP (mV)</b>              | -84.7±0.7                        | -84.2±0.7                        | -85.9±0.5                        | -85.1±0.9                        |
| <b>APA (mV)</b>              | 113.9±1.7                        | 112.6±1.5                        | 113.9±1.6                        | 112.4±1.5                        |
| <b>V<sub>max</sub> (V/s)</b> | 516.3±46.3                       | 485.3±42.7                       | 482.1±31.8                       | 459.8±42.0                       |
| <b>APD<sub>20</sub></b>      | 1.2±0.2                          | 1.3±0.2                          | 1.3±0.2                          | 1.5±0.2                          |
| <b>APD<sub>50</sub></b>      | 4.0±0.8                          | 4.7±0.6                          | 4.8±1.0                          | 5.2±0.6                          |
| <b>APD<sub>90</sub></b>      | 105.4±5.3                        | 98.1±3.6                         | 93.0±6.3                         | 90.1±4.0                         |

RMP, resting membrane potential; APA, action potential amplitude; V<sub>max</sub>, maximal upstroke velocity; APD<sub>20</sub>, APD<sub>50</sub>, APD<sub>90</sub>, action potential duration at 20%, 50%, 90% repolarization.

**Table S4:** Sodium current biophysical properties in left ventricular cardiomyocytes isolated from wild-type (WT) and *Scn5a*-p.Y1981N (YN) mice

|                                          | WT        | n | YN         | n |
|------------------------------------------|-----------|---|------------|---|
| <b><u>Current density</u></b>            |           |   |            |   |
| <b>I<sub>Na</sub> (pA/pF)</b>            | -56.0±2.7 | 8 | -51.4±4.3  | 7 |
| <b><u>Activation</u></b>                 |           |   |            |   |
| <b>V<sub>1/2</sub> (mV)</b>              | -44.8±0.7 | 8 | -42.2 ±1.4 | 7 |
| <b>k (mV)</b>                            | 4.8 ±0.2  | 8 | 5.1±0.3    | 7 |
| <b><u>Inactivation</u></b>               |           |   |            |   |
| <b>V<sub>1/2</sub> (mV)</b>              | -81.4±1.2 | 8 | -80.3±1.7  | 7 |
| <b>k (mV)</b>                            | -5.0±0.3  | 8 | -5.7±0.2   | 7 |
| <b><u>Recovery from inactivation</u></b> |           |   |            |   |
| <b>τ<sub>fast</sub> (ms)</b>             | 3.9±0.2   | 6 | 5.0 ±0.6   | 6 |
| <b>τ<sub>slow</sub> (ms)</b>             | 38.0±1.8  | 6 | 44.2±4.2   | 6 |

I<sub>Na</sub>, sodium current density measured at -30 mV; V<sub>1/2</sub> of (in)activation, half-voltage of (in)activation; *k*, slope of the (in)activation curves; τ<sub>fast</sub>, fast time constant of recovery from inactivation; τ<sub>slow</sub>, slow time constant of recovery from inactivation.
